# Supplementary material for: Genotype-specific spinal cord damage in spinocerebellar ataxias: an ENIGMA-Ataxia study
Source: PubMed Central journal article supplement (PMC11187354; doi:10.1136/jnnp-2023-332696), 2024-02-21
Supplement: jnnp-2023-332696supp001.pdf [file jnnp-2023-332696supp001.pdf]

**Supplementary Material****Supplementary Table 01:** Demographics data of SCA1 patients and age, sex and site matched control group per site.

| Controls         |             |      |        |                   |          |                                |
|------------------|-------------|------|--------|-------------------|----------|--------------------------------|
|                  | Age (years) | Sex  |        | CAG repeat length | SARA     | Time from Ataxia Onset (years) |
|                  |             | Male | Female |                   |          |                                |
| <b>Campinas</b>  | 45.5±9.3    | 21   | 10     | -                 | -        | -                              |
| <b>Essen</b>     | 46.8±11.5   | 5    | 10     | -                 | -        | -                              |
| <b>Minnesota</b> | 55.1±17.3   | 4    | 4      | -                 | -        | -                              |
| <b>Paris</b>     | 47.2±12.3   | 7    | 5      | -                 | -        | -                              |
| <b>Tubingen</b>  | 27.8±11.1   | 2    | 2      | -                 | -        | -                              |
| Patients         |             |      |        |                   |          |                                |
|                  | Age (years) | Sex  |        | CAG repeat length | SARA     | Time from Ataxia Onset (years) |
|                  |             | Male | Female |                   |          |                                |
| <b>Campinas</b>  | 45.3±9.3    | 20   | 10     | 44.4±4.2          | 14.5±6.3 | 7.5±6.1                        |
| <b>Essen</b>     | 47.4±11.7   | 6    | 10     | 46.3±5.0          | 14.0±5.8 | 9.4±4.2                        |
| <b>Minnesota</b> | 51.0±10.6   | 3    | 7      | 43.8±2.8          | 6.2±5.2  | 10.3±6.4                       |
| <b>Paris</b>     | 42.8±15.3   | 9    | 6      | 47.1±6.6          | 10.7±6.3 | 6.6±6.1                        |
| <b>Tubingen</b>  | 27.0±10.4   | 2    | 2      | 47.5±4.5          | 0.9±1.2  | 1.0±2.0                        |

**Supplementary Table 02:** Demographics data of SCA2 patients and age, sex and site matched control group per site.

| Controls         |             |      |        |                   |           |                                |
|------------------|-------------|------|--------|-------------------|-----------|--------------------------------|
|                  | Age (years) | Sex  |        | CAG repeat length | SARA      | Time from Ataxia Onset (years) |
|                  |             | Male | Female |                   |           |                                |
| <b>Campinas</b>  | 40.5±20.0   | 6    | 6      | -                 | -         | -                              |
| <b>Milan</b>     | 31.3±4.6    | 6    | 4      | -                 | -         | -                              |
| <b>Curitiba</b>  | 42.6±11.9   | 13   | 15     | -                 | -         | -                              |
| <b>Essen</b>     | 51.5±9.4    | 8    | 4      | -                 | -         | -                              |
| <b>Mexico</b>    | 41.6±14.0   | 7    | 9      | -                 | -         | -                              |
| <b>Minnesota</b> | 55.1±17.3   | 4    | 4      | -                 | -         | -                              |
| <b>Paris</b>     | 42.3±11.4   | 5    | 5      | -                 | -         | -                              |
| <b>Tubingen</b>  | 33.8±8.5    | 2    | 2      | -                 | -         | -                              |
| Patients         |             |      |        |                   |           |                                |
|                  | Age (years) | Sex  |        | CAG repeat length | SARA      | Time from Ataxia Onset (years) |
|                  |             | Male | Female |                   |           |                                |
| <b>Campinas</b>  | 41.1±18.8   | 8    | 6      | 45.9±10.5         | 18.7±13.2 | 8.8±5.7                        |
| <b>Milan</b>     | 46.6±9.1    | 1    | 9      | 41.2±3.1          | 13.4±6.4  | 11.8±4.7                       |
| <b>Curitiba</b>  | 45.2±11.6   | 8    | 9      | 41.7±2.9          | 14.5±6.1  | 11.5±5.2                       |
| <b>Essen</b>     | 52.1±9.8    | 10   | 4      | 39.8±2.1          | 11.7±10.8 | 10.8±7.8                       |
| <b>Mexico</b>    | 38.7±13.2   | 9    | 12     | 43.4±3.7          | 17.4±7.7  | -                              |
| <b>Minnesota</b> | 42.1±15.3   | 4    | 4      | 39.3±2.7          | 9.3±5.1   | 11.1±8.2                       |
| <b>Paris</b>     | 45.0±12.8   | 7    | 5      | 39.6±2.9          | 12.6±6.0  | 9.8±6.1                        |
| <b>Tubingen</b>  | 33.8±9.6    | 2    | 2      | 36.0±2.8          | 1.4±1.1   | 0.0±0.0                        |

**Supplementary Table 03:** Demographics data of SCA3 patients and age, sex and site matched control group per site.

| Controls  |             |      |        |                   |          |                                |
|-----------|-------------|------|--------|-------------------|----------|--------------------------------|
|           | Age (years) | Sex  |        | CAG repeat length | SARA     | Time from Ataxia Onset (years) |
|           |             | Male | Female |                   |          |                                |
| Campinas  | 47.6±11.6   | 42   | 44     | -                 | -        | -                              |
| Curitiba  | 45.0±11.7   | 11   | 8      | -                 | -        | -                              |
| Essen     | 51.5±9.5    | 8    | 4      | -                 | -        | -                              |
| Mexico    | 43.7±12.8   | 5    | 7      | -                 | -        | -                              |
| Minnesota | 55.1±17.3   | 4    | 4      | -                 | -        | -                              |
| Nijmegen  | 31.3±8.2    | 6    | 2      | -                 | -        | -                              |
| Paris     | 49.8±12.8   | 11   | 13     | -                 | -        | -                              |
| Tubingen  | 37.9±8.5    | 5    | 4      | -                 | -        | -                              |
| Patients  |             |      |        |                   |          |                                |
|           | Age (years) | Sex  |        | CAG repeat length | SARA     | Time from Ataxia Onset (years) |
|           |             | Male | Female |                   |          |                                |
| Campinas  | 48.6±12.    | 39   | 46     | 71.8±3.5          | 13.3±8.6 | 10.2±6.4                       |
| Curitiba  | 46.1±12.5   | 11   | 8      | -                 | 14.1±5.6 | 11.9±7.5                       |
| Essen     | 53.0±13.7   | 13   | 11     | 68.4±4.1          | 12.0±8.1 | 14.5±7.4                       |
| Mexico    | 41.0±13.0   | 6    | 8      | 74.3±3.4          | 12.1±7.4 | -                              |
| Minnesota | 49.3±5.8    | 5    | 2      | 70.7±2.2          | 7.4±2.5  | 8.3±5.4                        |
| Nijmegen  | 37.4±9.6    | 9    | 8      | 66.8±2.9          | 1.5±1.0  | 0.0±0.0                        |
| Paris     | 51.6±12.3   | 7    | 10     | 68.3±5.8          | 12.2±7.5 | 8.0±4.6                        |
| Tubingen  | 40.4±8.3    | 6    | 3      | 67.6±2.4          | 3.3±4.0  | 2.0±4.4                        |

**Supplementary Table 04:** Demographics data of SCA6 patients and age, sex and site matched control group per site.

| Controls         |             |      |        |                   |          |                                |
|------------------|-------------|------|--------|-------------------|----------|--------------------------------|
|                  | Age (years) | Sex  |        | CAG repeat length | SARA     | Time from Ataxia Onset (years) |
|                  |             | Male | Female |                   |          |                                |
| <b>Campinas</b>  | 64.8±5.3    | 9    | 5      | -                 | -        | -                              |
| <b>Essen</b>     | 60.4±12.5   | 15   | 9      | -                 | -        | -                              |
| <b>Minnesota</b> | 55.1±17.3   | 4    | 4      | -                 | -        | -                              |
| <b>Tubingen</b>  | 56.3±9.1    | 3    | 0      | -                 | -        | -                              |
| Patients         |             |      |        |                   |          |                                |
|                  | Age (years) | Sex  |        | CAG repeat length | SARA     | Time from Ataxia Onset (years) |
|                  |             | Male | Female |                   |          |                                |
| <b>Campinas</b>  | 67.9±7.9    | 10   | 7      | -                 | 13.9±6.3 | 14.1±7.0                       |
| <b>Essen</b>     | 61.6±10.9   | 15   | 10     | 22.4±1.3          | 13.3±7.0 | 11.3±6.3                       |
| <b>Minnesota</b> | 65.8±8.3    | 2    | 6      | 22.4±1.5          | 13.1±8.1 | 13.4±6.7                       |
| <b>Tubingen</b>  | 55.7±7.5    | 3    | 0      | 21.7±0.6          | 1.3±1.3  | 2.7±4.6                        |

**Supplementary Table 05:** Demographics data for all preataxic subjects.

|             |               | Average Age, y (range) | Sex, n (Male/Female) | CAG repeat length, long allele | Average SARA (range) | Average Time to Ataxia Onset, y (range) |
|-------------|---------------|------------------------|----------------------|--------------------------------|----------------------|-----------------------------------------|
| <b>SCA1</b> | Controls (9)  | 35.8±13.0 (19-56)      | 3/6                  | -                              | -                    | -                                       |
|             | Patients (11) | 35.4±12.3 (18-56)      | 3/8                  | 44.9±3.7 (40-54)               | 0.8±0.9 (0-2.5)      | -4.7±10.0 (-16.1-6.7)                   |
| <b>SCA2</b> | Controls (14) | 34.2±9.4 (23-56)       | 8/6                  | -                              | -                    | -                                       |
|             | Patients (9)  | 32.7±8.9 (23-48)       | 4/5                  | 37.8±3.0 (32-42)               | 1.2±0.9 (0-2.5)      | -3.3±5.1 (-9.2-4.5)                     |
| <b>SCA3</b> | Controls (24) | 38.2±9.8 (21-54)       | 12/12                | -                              | -                    | -                                       |
|             | Patients (36) | 39.0±9.1 (24-61)       | 15/21                | 70.3±4.3 (61-72)               | 11.3±8.2 (0-2.7)     | -9.2±2.3 (-30.0-8.4)                    |

**Supplementary Table 06:** Scanner and imaging acquisition details for each site.

|                               | Site            |                 |               |                  |                 |                          |              |                          |              |
|-------------------------------|-----------------|-----------------|---------------|------------------|-----------------|--------------------------|--------------|--------------------------|--------------|
|                               | Campinas        | Milan           | Curitiba      | Essen            | México          | Minnesota                | Nijmegen     | Paris                    | Tubingen     |
| <b>Scanner</b>                | Philips Achieva | Philips Achieva | Siemens Skyra | Siemens Biograph | Philips Achieva | Siemens Trio and Prisma  | Siemens Trio | Siemens Trio and Prisma  | Siemens Trio |
| <b>Field strength (T)</b>     | 3               | 3               | 3             | 3                | 3               | 3                        | 3            | 3                        | 3            |
| <b>Head coil (channels)</b>   | 8               | 32              | 16            | 16               | 32              | 32 (Trio)<br>64 (Prisma) | 32           | 32 (Trio)<br>64 (Prisma) | 32           |
| <b>Sequence</b>               | SPGR            | SPGR            | MPRAGE        | MPRAGE           | SPGR            | MPRAGE                   | MPRAGE       | MPRAGE                   | MPRAGE       |
| <b>TR (ms)</b>                | 7               | 8               | 2530          | 2530             | 8               | 2530                     | 2300         | 2530                     | 2300         |
| <b>TE (ms)</b>                | 3.201           | 3.5             | 3.36          | 3.26             | 3.7             | 3.65                     | 3.03         | 3.65                     | 3.51         |
| <b>TI (ms)</b>                | -               | -               | 1100          | 1100             | -               | 1100                     | 1100         | 900                      | 900          |
| <b>Flip (deg)</b>             | 8               | 8               | 7             | 7                |                 | 7                        | 8            | 9                        | 9            |
| <b>Plane</b>                  | Sagittal        | Sagittal        | Sagittal      | Sagittal         | Sagittal        | Coronal                  | Sagittal     | Sagittal                 | Sagittal     |
| <b>Slices</b>                 | 180             | 160             | 176           | 176              | 160             | 224                      | 192          | 160                      | 176          |
| <b>FOV (mm x mm)</b>          | 240x240         | 256x256         | 256 x 256     | 256x256          | 256x256         | 256x176                  | 256x256      | 256x256                  | 256x240      |
| <b>Voxel Size (mm, x y z)</b> | 1x1x1           | 1x1x1           | 1x1x1         | 1x1x1            | 1x1x1           | 1x1x1                    | 1x1x1        | 1x1x1                    | 1x1x1        |

**Supplementary Table 07:** Group differences between patients with SCA1 vs age, sex and site matched nonataxic control group.

| <b>CSA (mm<sup>2</sup>)</b> |                                       |                           |                                 |                        |
|-----------------------------|---------------------------------------|---------------------------|---------------------------------|------------------------|
| <b>Structures</b>           | <b>Healthy Controls<br/>(mean±SD)</b> | <b>SCA1<br/>(mean±SD)</b> | <b>p-value<br/>(Bonferroni)</b> | <b>Effect<br/>Size</b> |
| <b>C1</b>                   | 65.6 ± 7.6                            | 49.6 ± 8.1                | <0.001                          | 2.0                    |
| <b>C2</b>                   | 63.6 ± 8.0                            | 48.6 ± 7.2                | <0.001                          | 2.0                    |
| <b>C3</b>                   | 62.7 ± 7.9                            | 47.8 ± 7.1                | <0.001                          | 2.0                    |
| <b>C4</b>                   | 63.7 ± 8.2                            | 47.8 ± 8.3                | <0.001                          | 1.9                    |
| <b>Eccentricity</b>         |                                       |                           |                                 |                        |
| <b>Structures</b>           | <b>Healthy Controls<br/>(mean±SD)</b> | <b>SCA1<br/>(mean±SD)</b> | <b>p-value<br/>(Bonferroni)</b> | <b>Effect<br/>Size</b> |
| <b>C1</b>                   | 0.693 ± 0.061                         | 0.733 ± 0.069             | 0.002                           | 0.6                    |
| <b>C2</b>                   | 0.742 ± 0.051                         | 0.777 ± 0.052             | <0.001                          | 0.7                    |
| <b>C3</b>                   | 0.792 ± 0.044                         | 0.824 ± 0.038             | <0.001                          | 0.8                    |
| <b>C4</b>                   | 0.825 ± 0.037                         | 0.857 ± 0.030             | <0.001                          | 0.9                    |

**Supplementary Table 08:** Group differences between patients with SCA2 vs age, sex and site matched nonataxic control group.

| CSA (mm <sup>2</sup> ) |                            |                |                      |             |
|------------------------|----------------------------|----------------|----------------------|-------------|
| Structures             | Healthy Controls (mean±SD) | SCA2 (mean±SD) | p-value (Bonferroni) | Effect Size |
| <b>C1</b>              | 67.4 ± 8.8                 | 49.6 ± 8.2     | <0.001               | 2.1         |
| <b>C2</b>              | 65.3 ± 8.2                 | 48.0 ± 7.9     | <0.001               | 2.1         |
| <b>C3</b>              | 63.9 ± 8.4                 | 47.4 ± 8.3     | <0.001               | 2.0         |
| <b>C4</b>              | 63.8 ± 8.5                 | 47.9 ± 8.8     | <0.001               | 1.8         |
| Eccentricity           |                            |                |                      |             |
| Structures             | Healthy Controls (mean±SD) | SCA2 (mean±SD) | p-value (Bonferroni) | Effect Size |
| <b>C1</b>              | 0.692 ± 0.079              | 0.743 ± 0.070  | <0.001               | 0.7         |
| <b>C2</b>              | 0.731 ± 0.059              | 0.784 ± 0.049  | <0.001               | 0.9         |
| <b>C3</b>              | 0.781 ± 0.051              | 0.818 ± 0.050  | <0.001               | 0.7         |
| <b>C4</b>              | 0.825 ± 0.042              | 0.849 ± 0.042  | 0.004                | 0.6         |



**Supplementary Table 09:** Group differences between patients with SCA3 vs age, sex and site matched nonataxic control group.

| CSA (mm <sup>2</sup> ) |                            |                |                      |             |
|------------------------|----------------------------|----------------|----------------------|-------------|
| Structures             | Healthy Controls (mean±SD) | SCA3 (mean±SD) | p-value (Bonferroni) | Effect Size |
| <b>C1</b>              | 65.8 ± 7.9                 | 50.3 ± 7.8     | <0.001               | 2.0         |
| <b>C2</b>              | 64.0 ± 7.5                 | 49.3 ± 7.6     | <0.001               | 2.0         |
| <b>C3</b>              | 63.2 ± 7.6                 | 48.6 ± 8.1     | <0.001               | 1.9         |
| <b>C4</b>              | 63.8 ± 7.9                 | 49.9 ± 8.4     | <0.001               | 1.7         |
| Eccentricity           |                            |                |                      |             |
| Structures             | Healthy Controls (mean±SD) | SCA3 (mean±SD) | p-value (Bonferroni) | Effect Size |
| <b>C1</b>              | 0.684 ± 0.073              | 0.728 ± 0.074  | <0.001               | 0.6         |
| <b>C2</b>              | 0.730 ± 0.058              | 0.765 ± 0.056  | <0.001               | 0.6         |
| <b>C3</b>              | 0.783 ± 0.050              | 0.809 ± 0.050  | <0.001               | 0.5         |
| <b>C4</b>              | 0.828 ± 0.040              | 0.844 ± 0.040  | 0.003                | 0.4         |

**Supplementary Table 10:** Group differences between patients with SCA6 vs age, sex and site matched nonataxic control group.

| CSA (mm <sup>2</sup> ) |                            |                |                      |             |
|------------------------|----------------------------|----------------|----------------------|-------------|
| Structures             | Healthy Controls (mean±SD) | SCA6 (mean±SD) | p-value (Bonferroni) | Effect Size |
| C1                     | 66.7 ± 10.3                | 63.0 ± 8.2     | 0.353                | 0.3         |
| C2                     | 65.1 ± 8.8                 | 62.4 ± 8.8     | 0.757                | 0.3         |
| C3                     | 64.0 ± 9.1                 | 60.7 ± 8.3     | 0.297                | 0.3         |
| C4                     | 65.1 ± 9.3                 | 61.5 ± 8.9     | 0.451                | 0.3         |
| Eccentricity           |                            |                |                      |             |
| Structures             | Healthy Controls (mean±SD) | SCA6 (mean±SD) | p-value (Bonferroni) | Effect Size |
| C1                     | 0.725 ± 0.058              | 0.728 ± 0.056  | 0.999                | 0.1         |
| C2                     | 0.761 ± 0.047              | 0.757 ± 0.046  | 0.999                | 0.1         |
| C3                     | 0.810 ± 0.039              | 0.798 ± 0.041  | 0.503                | 0.3         |
| C4                     | 0.837 ± 0.034              | 0.836 ± 0.029  | 0.999                | 0.1         |

**Supplementary Table 11:** Results of ROI-based analyses to assess spinal cord damage at each stage of SCA1. Subgroups based on disease duration, <5: Time from ataxia onset <5 years, 5-10: Time from ataxia onset between 5-10 years, 10-15: Time from ataxia onset between 10-15 years, 15>: Time from ataxia onset >15 years. Preataxic subjects present SARA score <3 during clinical and MRI assessment (Jacobi et al, 2013).

| Vertebral Labels | Subgroup    | Measures                | Controls (mean±SD)      | SCA1 (mean±SD) | p-value (Bonferroni) | Effect Size |     |
|------------------|-------------|-------------------------|-------------------------|----------------|----------------------|-------------|-----|
| C1               | Preataxic   | Area (mm <sup>2</sup> ) | 63.8 ± 8.1              | 57.9 ± 6.2     | 0.362                | 0.8         |     |
|                  |             | ECC                     | 0.696 ± 0.064           | 0.719 ± 0.070  | 0.999                | 0.3         |     |
|                  | <5 years    | Area (mm <sup>2</sup> ) | 65.5 ± 5.5              | 51.2 ± 6.5     | <0.001               | 2.3         |     |
|                  |             | ECC                     | 0.673 ± 0.054           | 0.742 ± 0.068  | 0.036                | 1.1         |     |
|                  | 5-10 years  | Area (mm <sup>2</sup> ) | 66.2 ± 7.8              | 48.3 ± 8.0     | <0.001               | 2.3         |     |
|                  |             | ECC                     | 0.693 ± 0.061           | 0.729 ± 0.078  | 0.333                | 0.5         |     |
|                  | 10-15 years | Area (mm <sup>2</sup> ) | 63.7 ± 4.8              | 46.8 ± 7.2     | <0.001               | 2.7         |     |
|                  |             | ECC                     | 0.689 ± 0.045           | 0.767 ± 0.047  | 0.010                | 1.7         |     |
|                  | 15> years   | Area (mm <sup>2</sup> ) | 66.8 ± 8.2              | 46.7 ± 5.5     | <0.001               | 2.9         |     |
|                  |             | ECC                     | 0.728 ± 0.051           | 0.732 ± 0.043  | 0.999                | 0.1         |     |
|                  | C2          | Preataxic               | Area (mm <sup>2</sup> ) | 62.5 ± 8.7     | 56.6 ± 5.2           | 0.346       | 0.8 |
|                  |             |                         | ECC                     | 0.737 ± 0.059  | 0.778 ± 0.025        | 0.250       | 0.9 |
| <5 years         |             | Area (mm <sup>2</sup> ) | 64.3 ± 7.6              | 49.1 ± 5.6     | <0.001               | 2.3         |     |
|                  |             | ECC                     | 0.737 ± 0.042           | 0.775 ± 0.067  | 0.465                | 0.6         |     |
| 5-10 years       |             | Area (mm <sup>2</sup> ) | 63.6 ± 7.7              | 47.4 ± 7.2     | <0.001               | 2.2         |     |
|                  |             | ECC                     | 0.748 ± 0.053           | 0.774 ± 0.053  | 0.340                | 0.5         |     |
| 10-15 years      |             | Area (mm <sup>2</sup> ) | 60.9 ± 5.7              | 46.4 ± 6.0     | <0.001               | 2.5         |     |
|                  |             | ECC                     | 0.733 ± 0.050           | 0.799 ± 0.043  | 0.034                | 1.4         |     |
| 15> years        |             | Area (mm <sup>2</sup> ) | 65.4 ± 7.6              | 46.9 ± 5.4     | <0.001               | 2.8         |     |
|                  |             | ECC                     | 0.756 ± 0.038           | 0.781 ± 0.028  | 0.442                | 0.8         |     |
| C3               |             | Preataxic               | Area (mm <sup>2</sup> ) | 62.8 ± 8.8     | 56.1 ± 6.2           | 0.282       | 0.9 |
|                  |             |                         | ECC                     | 0.764 ± 0.056  | 0.811 ± 0.023        | 0.103       | 1.1 |

|             |             |                         |                         |               |               |        |     |
|-------------|-------------|-------------------------|-------------------------|---------------|---------------|--------|-----|
|             | <5 years    | Area (mm <sup>2</sup> ) | 63.5 ± 6.4              | 47.7 ± 5.6    | <0.001        | 2.6    |     |
|             |             | ECC                     | 0.787 ± 0.038           | 0.823 ± 0.048 | 0.143         | 0.9    |     |
|             | 5-10 years  | Area (mm <sup>2</sup> ) | 62.7 ± 8.4              | 46.2 ± 6.8    | <0.001        | 2.2    |     |
|             |             | ECC                     | 0.803 ± 0.042           | 0.825 ± 0.033 | 0.204         | 0.6    |     |
|             | 10-15 years | Area (mm <sup>2</sup> ) | 59.8 ± 6.4              | 46.5 ± 6.0    | 0.001         | 2.2    |     |
|             |             | ECC                     | 0.786 ± 0.039           | 0.839 ± 0.024 | 0.011         | 1.7    |     |
|             | 15> years   | Area (mm <sup>2</sup> ) | 62.8 ± 7.0              | 46.2 ± 6.1    | <0.001        | 2.5    |     |
|             |             | ECC                     | 0.800 ± 0.026           | 0.838 ± 0.034 | 0.067         | 1.2    |     |
|             | <b>C4</b>   | Preataxic               | Area (mm <sup>2</sup> ) | 66.1 ± 8.7    | 56.9 ± 6.4    | 0.204  | 1.2 |
|             |             |                         | ECC                     | 0.798 ± 0.022 | 0.832 ± 0.032 | 0.181  | 1.3 |
|             |             | <5 years                | Area (mm <sup>2</sup> ) | 63.9 ± 6.7    | 48.0 ± 6.8    | <0.001 | 2.3 |
|             |             |                         | ECC                     | 0.814 ± 0.032 | 0.861 ± 0.030 | 0.001  | 1.5 |
| 5-10 years  |             | Area (mm <sup>2</sup> ) | 66.2 ± 8.1              | 46.8 ± 7.7    | <0.001        | 2.5    |     |
|             |             | ECC                     | 0.829 ± 0.040           | 0.860 ± 0.028 | 0.038         | 0.9    |     |
| 10-15 years |             | Area (mm <sup>2</sup> ) | 59.7 ± 5.9              | 45.2 ± 9.5    | 0.014         | 1.8    |     |
|             |             | ECC                     | 0.837 ± 0.034           | 0.866 ± 0.027 | 0.314         | 1.0    |     |
| 15> years   |             | Area (mm <sup>2</sup> ) | 58.3 ± 7.3              | 46.4 ± 9.1    | 0.034         | 1.4    |     |
|             |             | ECC                     | 0.842 ± 0.031           | 0.859 ± 0.020 | 0.787         | 0.6    |     |

**Supplementary Table 12:** Results of ROI-based analyses to assess spinal cord damage at each stage of SCA2. Subgroups based on disease duration, <5: Time from ataxia onset <5 years, 5-10: Time from ataxia onset between 5-10 years, 10-15: Time from ataxia onset between 10-15 years, 15>: Time from ataxia onset >15 years. Preataxic subjects present SARA score <3 during clinical and MRI assessment (Jacobi et al, 2013).

| Vertebral Labels | Subgroup    | Measures                | Controls (mean±SD)      | SCA2 (mean±SD) | p-value (Bonferroni) | Effect Size |     |
|------------------|-------------|-------------------------|-------------------------|----------------|----------------------|-------------|-----|
| <b>C1</b>        | Preataxic   | Area (mm <sup>2</sup> ) | 65.7 ± 5.9              | 56.7 ± 5.9     | 0.003                | 1.6         |     |
|                  |             | ECC                     | 0.647 ± 0.090           | 0.708 ± 0.080  | 0.350                | 0.7         |     |
|                  | <5 years    | Area (mm <sup>2</sup> ) | 65.7 ± 6.8              | 51.4 ± 7.3     | 0.001                | 2.0         |     |
|                  |             | ECC                     | 0.651 ± 0.066           | 0.725 ± 0.054  | 0.046                | 1.2         |     |
|                  | 5-10 years  | Area (mm <sup>2</sup> ) | 68.7 ± 9.3              | 51.4 ± 8.6     | <0.001               | 2.4         |     |
|                  |             | ECC                     | 0.712 ± 0.085           | 0.763 ± 0.054  | 0.464                | 0.8         |     |
|                  | 10-15 years | Area (mm <sup>2</sup> ) | 68.5 ± 10.3             | 48.0 ± 7.8     | <0.001               | 2.4         |     |
|                  |             | ECC                     | 0.702 ± 0.068           | 0.729 ± 0.082  | 0.999                | 0.4         |     |
|                  | 15> years   | Area (mm <sup>2</sup> ) | 63.3 ± 8.4              | 46.7 ± 7.6     | <0.001               | 2.2         |     |
|                  |             | ECC                     | 0.711 ± 0.076           | 0.780 ± 0.048  | 0.013                | 1.2         |     |
|                  | <b>C2</b>   | Preataxic               | Area (mm <sup>2</sup> ) | 63.5 ± 6.9     | 53.1 ± 5.9           | 0.001       | 1.6 |
|                  |             |                         | ECC                     | 0.690 ± 0.058  | 0.757 ± 0.065        | 0.046       | 1.1 |
| <5 years         |             | Area (mm <sup>2</sup> ) | 63.5 ± 7.6              | 49.5 ± 7.1     | 0.001                | 1.9         |     |
|                  |             | ECC                     | 0.704 ± 0.052           | 0.775 ± 0.039  | 0.009                | 1.6         |     |
| 5-10 years       |             | Area (mm <sup>2</sup> ) | 65.8 ± 8.0              | 50.0 ± 7.9     | <0.001               | 2.3         |     |
|                  |             | ECC                     | 0.767 ± 0.044           | 0.802 ± 0.045  | 0.350                | 0.8         |     |
| 10-15 years      |             | Area (mm <sup>2</sup> ) | 67.2 ± 8.9              | 47.1 ± 8.6     | <0.001               | 2.4         |     |
|                  |             | ECC                     | 0.741 ± 0.049           | 0.779 ± 0.047  | 0.062                | 0.8         |     |
| 15> years        |             | Area (mm <sup>2</sup> ) | 61.7 ± 8.8              | 45.7 ± 8.0     | <0.001               | 2.0         |     |
|                  |             | ECC                     | 0.737 ± 0.078           | 0.807 ± 0.029  | 0.003                | 1.4         |     |
| <b>C3</b>        |             | Preataxic               | Area (mm <sup>2</sup> ) | 62.6 ± 7.2     | 52.3 ± 8.2           | 0.001       | 1.4 |
|                  |             |                         | ECC                     | 0.752 ± 0.063  | 0.773 ± 0.075        | 0.999       | 0.3 |

|             |             |                         |                         |               |               |       |     |
|-------------|-------------|-------------------------|-------------------------|---------------|---------------|-------|-----|
|             | <5 years    | Area (mm <sup>2</sup> ) | 63.1 ± 8.0              | 50.1 ± 6.6    | 0.003         | 1.8   |     |
|             |             | ECC                     | 0.753 ± 0.051           | 0.804 ± 0.026 | 0.036         | 1.3   |     |
|             | 5-10 years  | Area (mm <sup>2</sup> ) | 64.7 ± 8.4              | 49.0 ± 7.7    | <0.001        | 2.2   |     |
|             |             | ECC                     | 0.815 ± 0.026           | 0.838 ± 0.039 | 0.634         | 0.6   |     |
|             | 10-15 years | Area (mm <sup>2</sup> ) | 65.1 ± 9.4              | 46.0 ± 8.4    | <0.001        | 2.2   |     |
|             |             | ECC                     | 0.793 ± 0.042           | 0.822 ± 0.037 | 0.129         | 0.8   |     |
|             | 15> years   | Area (mm <sup>2</sup> ) | 59.5 ± 8.3              | 45.3 ± 8.8    | 0.001         | 1.7   |     |
|             |             | ECC                     | 0.798 ± 0.042           | 0.841 ± 0.023 | 0.006         | 1.3   |     |
|             | <b>C4</b>   | Preataxic               | Area (mm <sup>2</sup> ) | 64.6 ± 8.6    | 49.4 ± 7.8    | 0.056 | 1.8 |
|             |             |                         | ECC                     | 0.814 ± 0.057 | 0.810 ± 0.055 | 0.999 | 0.1 |
| <5 years    |             | Area (mm <sup>2</sup> ) | 62.6 ± 8.1              | 51.3 ± 6.4    | 0.008         | 1.6   |     |
|             |             | ECC                     | 0.801 ± 0.053           | 0.847 ± 0.023 | 0.064         | 1.2   |     |
| 5-10 years  |             | Area (mm <sup>2</sup> ) | 65.4 ± 7.0              | 49.9 ± 8.9    | <0.001        | 2.0   |     |
|             |             | ECC                     | 0.842 ± 0.028           | 0.860 ± 0.035 | 0.999         | 0.5   |     |
| 10-15 years |             | Area (mm <sup>2</sup> ) | 64.1 ± 9.0              | 45.7 ± 9.6    | <0.001        | 2.1   |     |
|             |             | ECC                     | 0.837 ± 0.029           | 0.861 ± 0.031 | 0.187         | 0.8   |     |
| 15> years   |             | Area (mm <sup>2</sup> ) | 59.5 ± 8.8              | 47.0 ± 10.2   | 0.053         | 1.3   |     |
|             |             | ECC                     | 0.820 ± 0.034           | 0.862 ± 0.026 | 0.017         | 1.4   |     |

**Supplementary Table 13:** Results of ROI-based analyses to assess spinal cord damage at each stage of SCA3. Subgroups based on disease duration, <5: Time from ataxia onset <5 years, 5-10: Time from ataxia onset between 5-10 years, 10-15: Time from ataxia onset between 10-15 years, 15>: Time from ataxia onset >15 years. Preataxic subjects present SARA score <3 during clinical and MRI assessment (Jacobi et al, 2013).

| Vertebral Labels | Subgroup    | Measures                | Controls (mean±SD)      | SCA3 (mean±SD) | p-value (Bonferroni) | Effect Size |     |
|------------------|-------------|-------------------------|-------------------------|----------------|----------------------|-------------|-----|
| C1               | Preataxic   | Area (mm <sup>2</sup> ) | 65.6 ± 6.6              | 56.6 ± 5.5     | <0.001               | 1.7         |     |
|                  |             | ECC                     | 0.673 ± 0.085           | 0.703 ± 0.079  | 0.742                | 0.4         |     |
|                  | <5 years    | Area (mm <sup>2</sup> ) | 65.3 ± 8.1              | 53.2 ± 6.7     | <0.001               | 2.0         |     |
|                  |             | ECC                     | 0.689 ± 0.080           | 0.726 ± 0.049  | 0.433                | 0.6         |     |
|                  | 5-10 years  | Area (mm <sup>2</sup> ) | 65.8 ± 7.5              | 49.8 ± 8.3     | <0.001               | 2.1         |     |
|                  |             | ECC                     | 0.684 ± 0.065           | 0.727 ± 0.080  | 0.030                | 0.6         |     |
|                  | 10-15 years | Area (mm <sup>2</sup> ) | 65.5 ± 8.1              | 48.6 ± 6.6     | <0.001               | 2.1         |     |
|                  |             | ECC                     | 0.683 ± 0.062           | 0.719 ± 0.071  | 0.089                | 0.5         |     |
|                  | 15> years   | Area (mm <sup>2</sup> ) | 66.6 ± 9.2              | 45.9 ± 7.8     | <0.001               | 2.4         |     |
|                  |             | ECC                     | 0.704 ± 0.067           | 0.766 ± 0.049  | <0.001               | 1.1         |     |
|                  | C2          | Preataxic               | Area (mm <sup>2</sup> ) | 65.2 ± 7.0     | 55.6 ± 4.9           | <0.001      | 1.7 |
|                  |             |                         | ECC                     | 0.723 ± 0.066  | 0.757 ± 0.051        | 0.166       | 0.6 |
| <5 years         |             | Area (mm <sup>2</sup> ) | 64.2 ± 7.8              | 51.9 ± 6.5     | <0.001               | 2.0         |     |
|                  |             | ECC                     | 0.731 ± 0.074           | 0.764 ± 0.045  | 0.440                | 0.5         |     |
| 5-10 years       |             | Area (mm <sup>2</sup> ) | 63.4 ± 6.8              | 48.5 ± 7.8     | <0.001               | 2.1         |     |
|                  |             | ECC                     | 0.729 ± 0.054           | 0.766 ± 0.059  | 0.019                | 0.6         |     |
| 10-15 years      |             | Area (mm <sup>2</sup> ) | 63.1 ± 7.7              | 47.7 ± 7.2     | <0.001               | 2.0         |     |
|                  |             | ECC                     | 0.734 ± 0.048           | 0.755 ± 0.060  | 0.362                | 0.4         |     |
| 15> years        |             | Area (mm <sup>2</sup> ) | 64.6 ± 8.2              | 45.0 ± 7.5     | <0.001               | 2.5         |     |
|                  |             | ECC                     | 0.743 ± 0.057           | 0.788 ± 0.051  | 0.002                | 0.9         |     |
| C3               |             | Preataxic               | Area (mm <sup>2</sup> ) | 64.7 ± 7.4     | 55.7 ± 4.8           | <0.001      | 1.6 |
|                  |             |                         | ECC                     | 0.787 ± 0.045  | 0.803 ± 0.040        | 0.897       | 0.4 |

|             |             |                         |                         |               |               |       |     |
|-------------|-------------|-------------------------|-------------------------|---------------|---------------|-------|-----|
|             | <5 years    | Area (mm <sup>2</sup> ) | 62.3 ± 7.3              | 51.1 ± 7.1    | <0.001        | 1.8   |     |
|             |             | ECC                     | 0.779 ± 0.062           | 0.805 ± 0.041 | 0.557         | 0.5   |     |
|             | 5-10 years  | Area (mm <sup>2</sup> ) | 62.7 ± 6.9              | 48.1 ± 7.9    | <0.001        | 2.0   |     |
|             |             | ECC                     | 0.780 ± 0.048           | 0.811 ± 0.047 | 0.025         | 0.6   |     |
|             | 10-15 years | Area (mm <sup>2</sup> ) | 61.9 ± 7.7              | 46.9 ± 7.4    | <0.001        | 1.9   |     |
|             |             | ECC                     | 0.790 ± 0.045           | 0.809 ± 0.051 | 0.398         | 0.4   |     |
|             | 15> years   | Area (mm <sup>2</sup> ) | 64.0 ± 8.0              | 43.7 ± 8.3    | <0.001        | 2.5   |     |
|             |             | ECC                     | 0.793 ± 0.045           | 0.826 ± 0.047 | 0.019         | 0.7   |     |
|             | <b>C4</b>   | Preataxic               | Area (mm <sup>2</sup> ) | 65.2 ± 8.6    | 56.9 ± 5.3    | 0.001 | 1.3 |
|             |             |                         | ECC                     | 0.826 ± 0.035 | 0.836 ± 0.037 | 0.999 | 0.3 |
| <5 years    |             | Area (mm <sup>2</sup> ) | 62.5 ± 6.1              | 51.7 ± 7.6    | <0.001        | 1.6   |     |
|             |             | ECC                     | 0.827 ± 0.047           | 0.841 ± 0.031 | 0.999         | 0.4   |     |
| 5-10 years  |             | Area (mm <sup>2</sup> ) | 63.7 ± 7.2              | 49.0 ± 8.8    | <0.001        | 1.8   |     |
|             |             | ECC                     | 0.823 ± 0.039           | 0.853 ± 0.045 | 0.025         | 0.7   |     |
| 10-15 years |             | Area (mm <sup>2</sup> ) | 63.2 ± 8.7              | 49.2 ± 7.7    | <0.001        | 1.6   |     |
|             |             | ECC                     | 0.833 ± 0.040           | 0.842 ± 0.036 | 0.999         | 0.2   |     |
| 15> years   |             | Area (mm <sup>2</sup> ) | 64.1 ± 8.0              | 45.2 ± 8.4    | <0.001        | 2.3   |     |
|             |             | ECC                     | 0.840 ± 0.032           | 0.854 ± 0.038 | 0.568         | 0.4   |     |



**Supplementary Table 14:** Correlations between ataxia severity (SARA score) and CSA or eccentricity for individuals with SCA1, SCA2, SCA3 and SCA6.

| CSA (mm <sup>2</sup> ) |        |         |        |         |        |         |        |         |
|------------------------|--------|---------|--------|---------|--------|---------|--------|---------|
|                        | SCA1   |         | SCA2   |         | SCA3   |         | SCA6   |         |
|                        | R      | p-value | R      | p-value | R      | p-value | R      | p-value |
| <b>C1</b>              | -0.620 | <0.001  | -0.614 | <0.001  | -0.424 | <0.001  | 0.064  | 0.999   |
| <b>C2</b>              | -0.612 | <0.001  | -0.543 | <0.001  | -0.434 | <0.001  | 0.021  | 0.999   |
| <b>C3</b>              | -0.618 | <0.001  | -0.504 | <0.001  | -0.509 | <0.001  | -0.035 | 0.999   |
| <b>C4</b>              | -0.618 | <0.001  | -0.413 | <0.001  | -0.524 | <0.001  | -0.054 | 0.999   |
| Eccentricity           |        |         |        |         |        |         |        |         |
|                        | SCA1   |         | SCA2   |         | SCA3   |         | SCA6   |         |
|                        | R      | p-value | R      | p-value | R      | p-value | R      | p-value |
| <b>C1</b>              | 0.229  | 0.212   | 0.277  | 0.024   | 0.141  | 0.210   | 0.064  | 0.999   |
| <b>C2</b>              | 0.173  | 0.581   | 0.228  | 0.099   | 0.118  | 0.426   | 0.021  | 0.999   |
| <b>C3</b>              | 0.223  | 0.241   | 0.335  | 0.004   | 0.126  | 0.352   | -0.035 | 0.999   |
| <b>C4</b>              | 0.424  | 0.002   | 0.167  | 0.622   | 0.129  | 0.438   | -0.054 | 0.999   |

**Supplementary Table 15:** Correlations between time from ataxia onset and CSA or eccentricity for individuals with SCA1, SCA2, SCA3 and SCA6.

| CSA (mm <sup>2</sup> ) |        |         |        |         |        |         |       |         |
|------------------------|--------|---------|--------|---------|--------|---------|-------|---------|
|                        | SCA1   |         | SCA2   |         | SCA3   |         | SCA6  |         |
|                        | R      | p-value | R      | p-value | R      | p-value | R     | p-value |
| <b>C1</b>              | -0.205 | 0.381   | -0.310 | 0.021   | -0.219 | 0.015   | 0.119 | 0.999   |
| <b>C2</b>              | -0.153 | 0.868   | -0.238 | 0.133   | -0.209 | 0.022   | 0.144 | 0.999   |
| <b>C3</b>              | -0.154 | 0.852   | -0.180 | 0.462   | -0.313 | <0.001  | 0.093 | 0.999   |
| <b>C4</b>              | -0.173 | 0.712   | -0.144 | 0.999   | -0.238 | 0.016   | 0.166 | 0.999   |
| Eccentricity           |        |         |        |         |        |         |       |         |
|                        | SCA1   |         | SCA2   |         | SCA3   |         | SCA6  |         |
|                        | R      | p-value | R      | p-value | R      | p-value | R     | p-value |
| <b>C1</b>              | 0.171  | 0.668   | 0.288  | 0.038   | 0.118  | 0.479   | 0.119 | 0.999   |
| <b>C2</b>              | 0.198  | 0.430   | 0.239  | 0.131   | 0.051  | 0.999   | 0.144 | 0.999   |
| <b>C3</b>              | 0.152  | 0.874   | 0.267  | 0.072   | 0.017  | 0.999   | 0.093 | 0.999   |
| <b>C4</b>              | 0.107  | 0.999   | 0.159  | 0.826   | -0.015 | 0.999   | 0.166 | 0.999   |

**Supplementary Table 16:** Results of ROI-based analyses to assess progressive spinal cord damage at each stage of SCA1 relative to the preataxic cohort.

| CSA (mm <sup>2</sup> ) |          |     |            |     |             |     |           |     |
|------------------------|----------|-----|------------|-----|-------------|-----|-----------|-----|
|                        | <5 years |     | 5-10 years |     | 10-15 years |     | 15> years |     |
|                        | p-value  | ES  | p-value    | ES  | p-value     | ES  | p-value   | ES  |
| <b>C1</b>              | 0.023    | 1.0 | 0.001      | 1.3 | 0.001       | 1.3 | <0.001    | 1.9 |
| <b>C2</b>              | 0.008    | 1.3 | <0.001     | 1.4 | 0.019       | 0.9 | 0.001     | 1.8 |
| <b>C3</b>              | 0.010    | 1.4 | 0.001      | 1.5 | 0.032       | 0.8 | 0.002     | 1.6 |
| <b>C4</b>              | 0.013    | 1.3 | 0.005      | 1.4 | 0.245       | 0.5 | 0.019     | 1.3 |
| Eccentricity           |          |     |            |     |             |     |           |     |
|                        | <5 years |     | 5-10 years |     | 10-15 years |     | 15> years |     |
|                        | p-value  | ES  | p-value    | ES  | p-value     | ES  | p-value   | ES  |
| <b>C1</b>              | 0.598    | 0.3 | 0.661      | 0.1 | 0.449       | 0.3 | 0.621     | 0.2 |
| <b>C2</b>              | 0.598    | 0.1 | 0.742      | 0.1 | 0.265       | 0.4 | 0.791     | 0.1 |
| <b>C3</b>              | 0.268    | 0.3 | 0.134      | 0.4 | 0.011       | 1.0 | 0.058     | 0.9 |
| <b>C4</b>              | 0.045    | 0.9 | 0.059      | 1.0 | 0.006       | 1.3 | 0.053     | 1.0 |

**Supplementary Table 17:** Results of ROI-based analyses to assess progressive spinal cord damage at each stage of SCA2 relative to the preataxic cohort.

| CSA (mm <sup>2</sup> ) |          |     |            |     |             |     |           |     |
|------------------------|----------|-----|------------|-----|-------------|-----|-----------|-----|
|                        | <5 years |     | 5-10 years |     | 10-15 years |     | 15> years |     |
|                        | p-value  | ES  | p-value    | ES  | p-value     | ES  | p-value   | ES  |
| <b>C1</b>              | 0.058    | 0.8 | 0.029      | 0.8 | 0.001       | 1.3 | 0.001     | 1.3 |
| <b>C2</b>              | 0.177    | 0.6 | 0.171      | 0.5 | 0.019       | 0.9 | 0.012     | 1.0 |
| <b>C3</b>              | 0.402    | 0.4 | 0.166      | 0.5 | 0.032       | 0.8 | 0.024     | 0.9 |
| <b>C4</b>              | 0.638    | 0.2 | 0.968      | 0.0 | 0.245       | 0.5 | 0.489     | 0.3 |
| Eccentricity           |          |     |            |     |             |     |           |     |
|                        | <5 years |     | 5-10 years |     | 10-15 years |     | 15> years |     |
|                        | p-value  | ES  | p-value    | ES  | p-value     | ES  | p-value   | ES  |
| <b>C1</b>              | 0.557    | 0.2 | 0.029      | 0.8 | 0.449       | 0.3 | 0.005     | 1.1 |
| <b>C2</b>              | 0.448    | 0.3 | 0.033      | 0.8 | 0.265       | 0.4 | 0.011     | 1.0 |
| <b>C3</b>              | 0.176    | 0.6 | 0.003      | 1.2 | 0.011       | 1.0 | 0.001     | 1.4 |
| <b>C4</b>              | 0.043    | 1.0 | 0.007      | 1.3 | 0.006       | 1.3 | 0.004     | 1.4 |

**Supplementary Table 18:** Results of ROI-based analyses to assess progressive spinal cord damage at each stage of SCA3 relative to the preataxic cohort.

| CSA (mm <sup>2</sup> ) |          |     |            |     |             |      |           |     |
|------------------------|----------|-----|------------|-----|-------------|------|-----------|-----|
|                        | <5 years |     | 5-10 years |     | 10-15 years |      | 15> years |     |
|                        | p-value  | ES  | p-value    | ES  | p-value     | ES   | p-value   | ES  |
| <b>C1</b>              | 0.010    | 0.7 | <0.001     | 1.1 | <0.001      | 1.3  | <0.001    | 1.7 |
| <b>C2</b>              | 0.006    | 0.8 | <0.001     | 1.1 | <0.001      | 1.3  | <0.001    | 1.7 |
| <b>C3</b>              | 0.002    | 0.9 | <0.001     | 1.2 | <0.001      | 1.4  | <0.001    | 1.8 |
| <b>C4</b>              | 0.008    | 0.8 | <0.001     | 1.0 | <0.001      | 1.1  | <0.001    | 1.6 |
| Eccentricity           |          |     |            |     |             |      |           |     |
|                        | <5 years |     | 5-10 years |     | 10-15 years |      | 15> years |     |
|                        | p-value  | ES  | p-value    | ES  | p-value     | ES   | p-value   | ES  |
| <b>C1</b>              | 0.243    | 0.3 | 0.180      | 0.3 | 0.362       | 0.2  | <0.001    | 1.0 |
| <b>C2</b>              | 0.630    | 0.1 | 0.481      | 0.2 | 0.906       | <0.1 | 0.011     | 0.6 |
| <b>C3</b>              | 0.801    | 0.1 | 0.408      | 0.2 | 0.557       | 0.1  | 0.021     | 0.5 |
| <b>C4</b>              | 0.647    | 0.1 | 0.108      | 0.4 | 0.564       | 0.2  | 0.076     | 0.5 |

**Supplementary Table 19:** Results of ROI-based analyses to assess spinal cord damage at each stage of SCA6. Subgroups based on disease duration, <5: Time from ataxia onset <5 years, 5-10: Time from ataxia onset between 5-10 years, 10-15: Time from ataxia onset between 10-15 years, 15>: Time from ataxia onset >15 years.

| Vertebral Labels | Subgroup    | Measures                | Controls (mean±SD)      | SCA3 (mean±SD) | p-value (Bonferroni) | Effect Size |   |
|------------------|-------------|-------------------------|-------------------------|----------------|----------------------|-------------|---|
| <b>C1</b>        | Preataxic   | Area (mm <sup>2</sup> ) | -                       | -              | -                    | -           |   |
|                  |             | ECC                     | -                       | -              | -                    | -           |   |
|                  | <5 years    | Area (mm <sup>2</sup> ) | 66.6 ± 5.0              | 62.5 ± 7.5     | 0.859                | 0.6         |   |
|                  |             | ECC                     | 0.744 ± 0.068           | 0.705 ± 0.043  | 0.711                | 0.7         |   |
|                  | 5-10 years  | Area (mm <sup>2</sup> ) | 62.7 ± 8.1              | 65.1 ± 8.8     | 0.667                | 0.3         |   |
|                  |             | ECC                     | 0.731 ± 0.064           | 0.758 ± 0.035  | 0.747                | 0.5         |   |
|                  | 10-15 years | Area (mm <sup>2</sup> ) | 64.7 ± 7.9              | 61.2 ± 8.7     | 0.999                | 0.4         |   |
|                  |             | ECC                     | 0.726 ± 0.037           | 0.724 ± 0.076  | 0.999                | <0.1        |   |
|                  | 15> years   | Area (mm <sup>2</sup> ) | 69.3 ± 10.5             | 64.5 ± 8.3     | 0.743                | 0.5         |   |
|                  |             | ECC                     | 0.712 ± 0.060           | 0.713 ± 0.047  | 0.999                | <0.1        |   |
|                  | <b>C2</b>   | Preataxic               | Area (mm <sup>2</sup> ) | -              | -                    | -           | - |
|                  |             |                         | ECC                     | -              | -                    | -           | - |
| <5 years         |             | Area (mm <sup>2</sup> ) | 63.5 ± 5.0              | 62.6 ± 5.5     | 0.999                | 0.2         |   |
|                  |             | ECC                     | 0.768 ± 0.044           | 0.739 ± 0.027  | 0.481                | 0.8         |   |
| 5-10 years       |             | Area (mm <sup>2</sup> ) | 60.9 ± 7.4              | 65.3 ± 7.8     | 0.667                | 0.6         |   |
|                  |             | ECC                     | 0.773 ± 0.046           | 0.774 ± 0.042  | 0.999                | <0.1        |   |
| 10-15 years      |             | Area (mm <sup>2</sup> ) | 63.8 ± 6.7              | 59.8 ± 7.3     | 0.768                | 0.6         |   |
|                  |             | ECC                     | 0.750 ± 0.038           | 0.768 ± 0.056  | 0.999                | 0.4         |   |
| 15> years        |             | Area (mm <sup>2</sup> ) | 69.1 ± 6.4              | 64.3 ± 9.7     | 0.565                | 0.6         |   |
|                  |             | ECC                     | 0.758 ± 0.043           | 0.737 ± 0.033  | 0.645                | 0.5         |   |
| <b>C3</b>        |             | Preataxic               | Area (mm <sup>2</sup> ) | -              | -                    | -           | - |
|                  |             |                         | ECC                     | -              | -                    | -           | - |
|                  | <5 years    | Area (mm <sup>2</sup> ) | 62.1 ± 6.4              | 62.1 ± 8.7     | 0.999                | <0.1        |   |

|           |             |                         |               |               |       |     |
|-----------|-------------|-------------------------|---------------|---------------|-------|-----|
|           |             | ECC                     | 0.809 ± 0.033 | 0.778 ± 0.034 | 0.353 | 0.9 |
|           | 5-10 years  | Area (mm <sup>2</sup> ) | 61.7 ± 6.9    | 62.8 ± 8.1    | 0.999 | 0.2 |
|           |             | ECC                     | 0.814 ± 0.034 | 0.816 ± 0.025 | 0.999 | 0.1 |
|           | 10-15 years | Area (mm <sup>2</sup> ) | 62.3 ± 8.4    | 58.9 ± 6.2    | 0.999 | 0.5 |
|           |             | ECC                     | 0.816 ± 0.037 | 0.800 ± 0.059 | 0.999 | 0.3 |
|           | 15> years   | Area (mm <sup>2</sup> ) | 66.7 ± 7.5    | 62.4 ± 9.0    | 0.760 | 0.5 |
|           |             | ECC                     | 0.809 ± 0.035 | 0.789 ± 0.031 | 0.514 | 0.6 |
| <b>C4</b> | Preataxic   | Area (mm <sup>2</sup> ) | -             | -             | -     | -   |
|           |             | ECC                     | -             | -             | -     | -   |
|           | <5 years    | Area (mm <sup>2</sup> ) | 67.1 ± 6.6    | 57.6 ± 4.2    | 0.134 | 1.8 |
|           |             | ECC                     | 0.837 ± 0.053 | 0.845 ± 0.024 | 0.999 | 0.2 |
|           | 5-10 years  | Area (mm <sup>2</sup> ) | 60.0 ± 9.6    | 62.9 ± 9.8    | 0.999 | 0.3 |
|           |             | ECC                     | 0.839 ± 0.026 | 0.844 ± 0.031 | 0.999 | 0.2 |
|           | 10-15 years | Area (mm <sup>2</sup> ) | 63.4 ± 9.2    | 61.7 ± 9.2    | 0.999 | 0.2 |
|           |             | ECC                     | 0.847 ± 0.024 | 0.832 ± 0.031 | 0.938 | 0.6 |
|           | 15> years   | Area (mm <sup>2</sup> ) | 67.3 ± 8.7    | 62.7 ± 8.7    | 0.853 | 0.5 |
|           |             | ECC                     | 0.839 ± 0.027 | 0.826 ± 0.028 | 0.999 | 0.5 |

**Supplementary Table 20:** Results of ROI-based analyses to assess progressive spinal cord damage at each stage of SCA6 relative to the cohort with time from ataxia onset <5 years.

| CSA (mm <sup>2</sup> ) |          |    |            |     |             |     |           |     |
|------------------------|----------|----|------------|-----|-------------|-----|-----------|-----|
|                        | <5 years |    | 5-10 years |     | 10-15 years |     | 15> years |     |
|                        | p-value  | ES | p-value    | ES  | p-value     | ES  | p-value   | ES  |
| <b>C1</b>              | -        | -  | 0.538      | 0.3 | 0.966       | 0.2 | 0.425     | 0.1 |
| <b>C2</b>              | -        | -  | 0.389      | 0.4 | 0.808       | 0.4 | 0.331     | 0.1 |
| <b>C3</b>              | -        | -  | 0.722      | 0.1 | 0.692       | 0.5 | 0.419     | 0.1 |
| <b>C4</b>              | -        | -  | 0.166      | 0.5 | 0.303       | 0.4 | 0.206     | 0.5 |
| Eccentricity           |          |    |            |     |             |     |           |     |
|                        | <5 years |    | 5-10 years |     | 10-15 years |     | 15> years |     |
|                        | p-value  | ES | p-value    | ES  | p-value     | ES  | p-value   | ES  |
| <b>C1</b>              | -        | -  | 0.010      | 1.4 | 0.416       | 0.3 | 0.231     | 0.2 |
| <b>C2</b>              | -        | -  | 0.053      | 0.9 | 0.216       | 0.6 | 0.531     | 0.1 |
| <b>C3</b>              | -        | -  | 0.008      | 1.3 | 0.443       | 0.4 | 0.414     | 0.3 |
| <b>C4</b>              | -        | -  | 0.875      | 0.1 | 0.591       | 0.5 | 0.446     | 0.8 |

**Supplementary Table 21:** Comparison of coefficients between linear and quadratic models for the graph of z-transformed CSA/eccentricity versus time from ataxia onset of the SCA1 cohort.

| CSA (mm <sup>2</sup> ) |           |       |           |                    |             |               |                  |         |
|------------------------|-----------|-------|-----------|--------------------|-------------|---------------|------------------|---------|
| Vertebral Level        | Model     | RMSE  | R-Squared | Adjusted R-Squared | F-statistic | Model p-value | R-squared Change | p-value |
| C1                     | Linear    | 0.960 | 0.129     | 0.116              | 10.2        | 0.002         | 0.030            | 0.112   |
|                        | Quadratic | 0.950 | 0.159     | 0.134              | 6.4         | 0.003         |                  |         |
| C2                     | Linear    | 0.811 | 0.124     | 0.112              | 9.8         | 0.003         | 0.055            | 0.032   |
|                        | Quadratic | 0.791 | 0.179     | 0.155              | 7.4         | 0.001         |                  |         |
| C3                     | Linear    | 0.845 | 0.134     | 0.122              | 10.7        | 0.002         | 0.045            | 0.050   |
|                        | Quadratic | 0.828 | 0.180     | 0.155              | 7.4         | 0.001         |                  |         |
| C4                     | Linear    | 0.994 | 0.094     | 0.080              | 6.5         | 0.013         | 0.021            | 0.220   |
|                        | Quadratic | 0.991 | 0.115     | 0.086              | 4.0         | 0.023         |                  |         |
| Eccentricity           |           |       |           |                    |             |               |                  |         |
| Vertebral Level        | Model     | RMSE  | R-Squared | Adjusted R-Squared | F-statistic | Model p-value | R-squared Change | p-value |
| C1                     | Linear    | 1.147 | 0.004     | -0.010             | 0.3         | 0.601         | 0.002            | 0.698   |
|                        | Quadratic | 1.154 | 0.006     | -0.023             | 0.2         | 0.812         |                  |         |
| C2                     | Linear    | 0.982 | 0.013     | -0.002             | 0.9         | 0.348         | <0.001           | 0.972   |
|                        | Quadratic | 0.989 | 0.013     | -0.016             | 0.4         | 0.646         |                  |         |
| C3                     | Linear    | 0.791 | 0.049     | 0.035              | 3.5         | 0.065         | 0.009            | 0.403   |
|                        | Quadratic | 0.793 | 0.058     | 0.030              | 2.1         | 0.131         |                  |         |
| C4                     | Linear    | 0.765 | 0.074     | 0.059              | 5.0         | 0.028         | 0.080            | 0.015   |
|                        | Quadratic | 0.737 | 0.154     | 0.127              | 5.6         | 0.006         |                  |         |



**Supplementary Table 22:** Comparison coefficients between linear and quadratic models for the graph of z-transformed CSA/eccentricity versus time from ataxia onset of the SCA2 cohort.

| CSA (mm <sup>2</sup> ) |           |       |           |                    |             |               |                  |         |
|------------------------|-----------|-------|-----------|--------------------|-------------|---------------|------------------|---------|
| Vertebral Level        | Model     | RMSE  | R-Squared | Adjusted R-Squared | F-statistic | Model p-value | R-squared Change | p-value |
| C1                     | Linear    | 0.878 | 0.102     | 0.089              | 7.9         | 0.006         | 0.007            | 0.448   |
|                        | Quadratic | 0.881 | 0.109     | 0.083              | 4.2         | 0.019         |                  |         |
| C2                     | Linear    | 0.952 | 0.067     | 0.054              | 5.0         | 0.028         | 0.004            | 0.583   |
|                        | Quadratic | 0.957 | 0.071     | 0.044              | 2.6         | 0.079         |                  |         |
| C3                     | Linear    | 0.927 | 0.066     | 0.052              | 4.8         | 0.032         | 0.016            | 0.272   |
|                        | Quadratic | 0.926 | 0.082     | 0.054              | 3.0         | 0.058         |                  |         |
| C4                     | Linear    | 1.059 | 0.025     | 0.007              | 1.4         | 0.240         | 0.011            | 0.427   |
|                        | Quadratic | 1.063 | 0.035     | 0.000              | 1.0         | 0.374         |                  |         |
| Eccentricity           |           |       |           |                    |             |               |                  |         |
| Vertebral Level        | Model     | RMSE  | R-Squared | Adjusted R-Squared | F-statistic | Model p-value | R-squared Change | p-value |
| C1                     | Linear    | 0.812 | 0.077     | 0.064              | 5.8         | 0.018         | 0.003            | 0.619   |
|                        | Quadratic | 0.817 | 0.080     | 0.053              | 3.0         | 0.056         |                  |         |
| C2                     | Linear    | 0.769 | 0.110     | 0.097              | 8.7         | 0.004         | 0.006            | 0.471   |
|                        | Quadratic | 0.772 | 0.117     | 0.091              | 4.6         | 0.014         |                  |         |
| C3                     | Linear    | 0.824 | 0.178     | 0.166              | 14.7        | <0.001        | 0.077            | 0.009   |
|                        | Quadratic | 0.790 | 0.255     | 0.232              | 11.4        | <0.001        |                  |         |
| C4                     | Linear    | 0.767 | 0.083     | 0.066              | 5.0         | 0.029         | 0.060            | 0.047   |
|                        | Quadratic | 0.748 | 0.143     | 0.112              | 4.6         | 0.014         |                  |         |

**Supplementary Table 23:** Comparison coefficients between linear and quadratic models for the graph of z-transformed CSA/eccentricity versus time from ataxia onset of the SCA3 cohort.

| CSA (mm <sup>2</sup> ) |           |       |           |                    |             |               |                  |         |
|------------------------|-----------|-------|-----------|--------------------|-------------|---------------|------------------|---------|
| Vertebral Level        | Model     | RMSE  | R-Squared | Adjusted R-Squared | F-statistic | Model p-value | R-squared Change | p-value |
| C1                     | Linear    | 0.899 | 0.212     | 0.208              | 46.6        | <0.001        | 0.002            | 0.507   |
|                        | Quadratic | 0.901 | 0.214     | 0.205              | 23.5        | <0.001        |                  |         |
| C2                     | Linear    | 0.940 | 0.201     | 0.197              | 43.6        | <0.001        | <0.001           | 0.934   |
|                        | Quadratic | 0.943 | 0.201     | 0.192              | 21.7        | <0.001        |                  |         |
| C3                     | Linear    | 0.975 | 0.235     | 0.231              | 51.3        | <0.001        | <0.001           | 0.862   |
|                        | Quadratic | 0.977 | 0.235     | 0.226              | 25.5        | <0.001        |                  |         |
| C4                     | Linear    | 1.124 | 0.147     | 0.141              | 25.0        | <0.001        | <0.001           | 0.895   |
|                        | Quadratic | 1.127 | 0.147     | 0.135              | 12.4        | <0.001        |                  |         |
| Eccentricity           |           |       |           |                    |             |               |                  |         |
| Vertebral Level        | Model     | RMSE  | R-Squared | Adjusted R-Squared | F-statistic | Model p-value | R-squared Change | p-value |
| C1                     | Linear    | 0.990 | 0.079     | 0.074              | 14.9        | <0.001        | <0.001           | 0.981   |
|                        | Quadratic | 0.993 | 0.079     | 0.069              | 7.4         | 0.001         |                  |         |
| C2                     | Linear    | 0.958 | 0.019     | 0.013              | 3.3         | 0.072         | 0.002            | 0.523   |
|                        | Quadratic | 0.960 | 0.021     | 0.010              | 1.8         | 0.162         |                  |         |
| C3                     | Linear    | 0.956 | 0.034     | 0.029              | 5.9         | 0.016         | <0.001           | 0.973   |
|                        | Quadratic | 0.959 | 0.034     | 0.023              | 3.0         | 0.055         |                  |         |
| C4                     | Linear    | 1.000 | 0.014     | 0.007              | 2.0         | 0.160         | 0.001            | 0.663   |
|                        | Quadratic | 1.003 | 0.015     | 0.001              | 1.1         | 0.341         |                  |         |

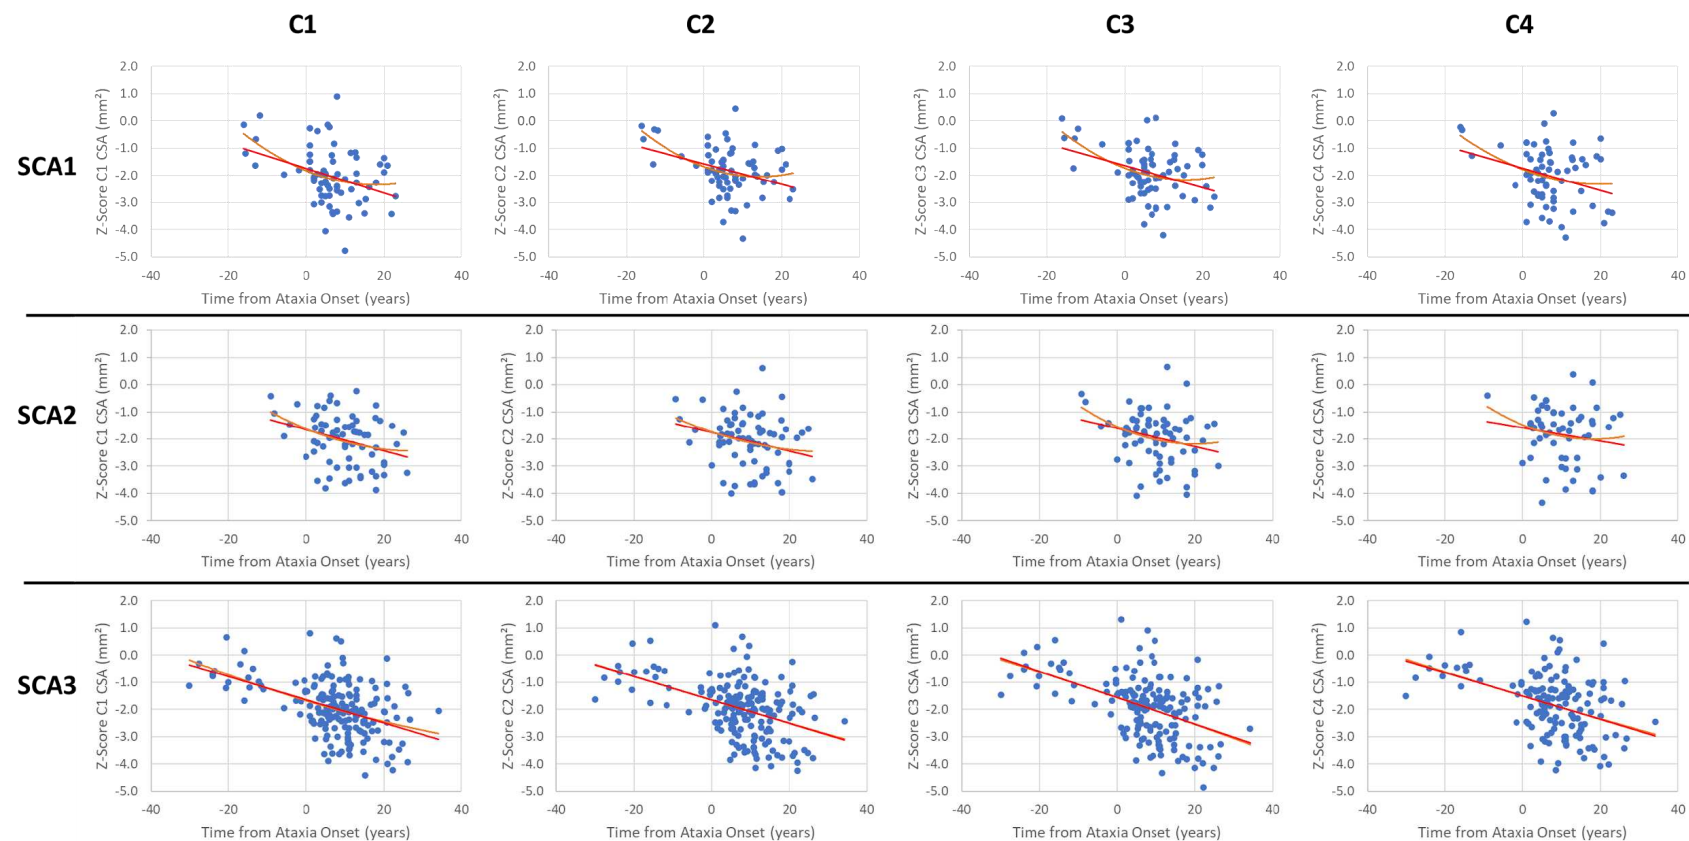

**Supplementary Figure 01:** Graphs of z-transformed CSA versus time from ataxia onset. The negative values for disease duration indicate the predicted time to ataxia onset calculated using Tezenas formulas for SCA1 and SCA2 (Tezenas du Montcel et al, 2014) and Peng formula for SCA3 (Peng et al, 2021), both are based on CAG repeat length and current participant age.

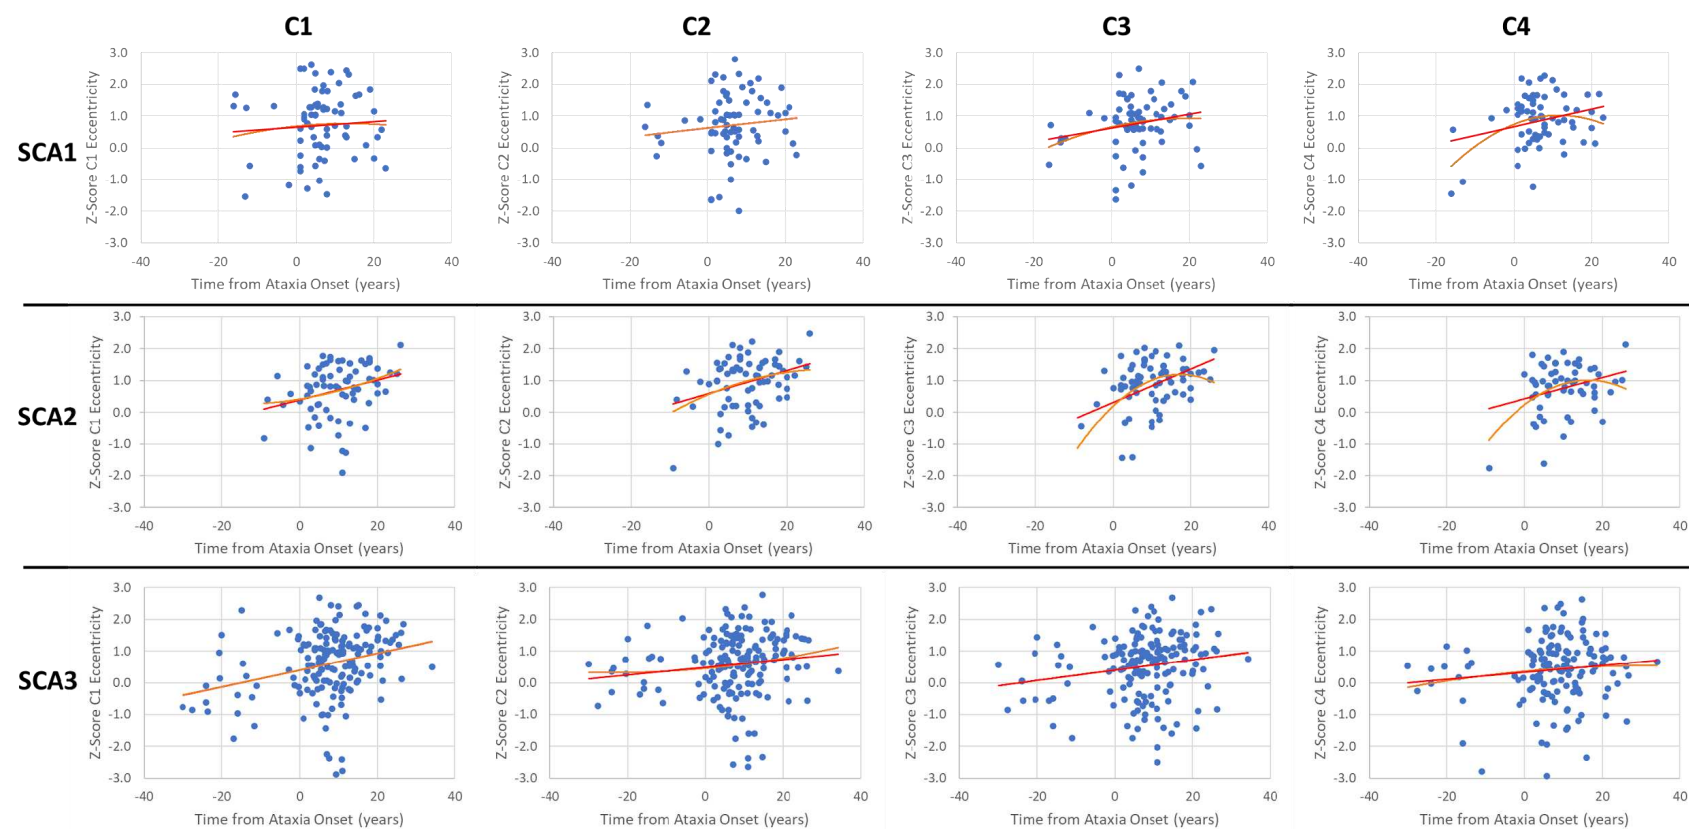

**Supplementary Figure 02:** Graphs of z-transformed Eccentricity versus time from ataxia onset. The negative values for disease duration indicate the predicted time to ataxia onset calculated using Tezenas formulas for SCA1 and SCA2 (Tezenas du Montcel et al, 2014) and Peng formula for SCA3 (Peng et al, 2021), both are based on CAG repeat length and current participant age.
